# Supplementary material for: Forest soil carbon stock estimates in a nationwide inventory: evaluating performance of the ROMULv and Yasso07 models in Finland
Source: Copernicus journal article supplement (doi:10.5194/gmd-9-4169-2016), 2016-11-22
Supplement: Supplementary file 1 [file gmd-9-4169-2016-supplement.zip]

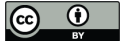

## *Supplement of*

# **Forest soil carbon stock estimates in a nationwide inventory: evaluating performance of the ROMULv and Yasso07 models in Finland**

**Aleksi Lehtonen et al.**

*Correspondence to:* Aleksi Lehtonen (aleksi.lehtonen@luke.fi)

- [gmd-9-4169-2016-supplement-title-page.pdf](#)
- [Romul.f](#)
- [gmd\\_Lehtonen\\_supplement\\_proofs.pdf](#)

The copyright of individual parts of the supplement might differ from the CC-BY 3.0 licence.
