# Supplementary material for: Forest soil carbon stock estimates in a nationwide inventory: evaluating performance of the ROMULv and Yasso07 models in Finland
Source: Copernicus journal article supplement (doi:10.5194/gmd-9-4169-2016), 2016-11-22
Supplement: Supplementary file 2 [file gmd-9-4169-2016-supplement.zip]

## 1. Fineroot turnover rate modeling

Fineroot turnover rates were based on Kleja et al. (2008) and to Leppälammi-Kujansuu et al. (2014). It was assumed that the turnover rate of fineroots is 85% in Southern Finland in areas where temperature sum during the growing season (with 5 C° threshold) is more than 1200. For Northern Finland we used turnover rate of 50% when temperature sum was less than 700. For sites where temperature sums were between 700 and 1200 we interpolated the turnover rate with a simple linear regression,

$$y = b_0 + b_1 \times x, \text{ where}$$

$y$  is the turnover rate and  $b_0$  equals 0.0007,  $b_1$  equals 0.001 and  $x$  is degree days that varies between 700 and 1200 degrees.

## 2. Estimation of understorey biomass

Here we provide parameter estimates for understorey models (Table S1) and figures for model fits (Figs. S1 & S2).

Table S1. Parameter estimates for understorey models by species groups and regions. Where  $\beta_0$  is the intercept and  $\beta_1$  is a slope of the fixed part of the model and bc is the bias correction. Var  $b_0$ , Cov  $b_0b_1$  and Var  $b_1$  originate from variance-covariance matrix of the fixed part of the model. Var pop lists unexplained variance and Var plt lists unexplained variance after plot as a random effect.

| Group       | Com. | Reg. | $\beta_0$ | $\beta_1$ | bc    | Var $\beta_0$ | Cov $\beta_0 \beta_1$ | Var $\beta_1$ | Var Pop | Var Plt |
|-------------|------|------|-----------|-----------|-------|---------------|-----------------------|---------------|---------|---------|
| Dwarf shrub | Ab   | NF   | 3.62      | 0.948     | 0.135 | 0.115         | -0.028                | 0.008         | 0.285   | 0.136   |
| Dwarf shrub | Ab   | SF   | 2.653     | 1.107     | 0.186 | 0.081         | -0.015                | 0.005         | 0.45    | 0.16    |
| Grass       | Ab   | -    | 2.75      | 0.918     | 0.292 | 0.129         | -0.03                 | 0.01          | 0.688   | 0.273   |
| Herb        | Ab   | -    | 1.116     | 1.08      | 0.445 | 0.074         | -0.018                | 0.008         | 0.832   | 0.572   |
| Bryophytes  | Ab   | -    | 3.13      | 0.795     | 0.281 | 0.301         | -0.072                | 0.018         | 0.633   | 0.306   |
| Lichen      | Ab   | -    | 3.69      | 0.894     | 0.109 | 0.047         | -0.012                | 0.005         | 0.27    | 0.175   |
| Shrub       | Bl   | NF   | 6.278     | 0.45      | 0.161 | 0.086         | -0.02                 | 0.006         | 0.315   | 0.241   |
| Shrub       | Bl   | SF   | 3.73      | 0.831     | 0.458 | 0.15          | -0.035                | 0.011         | 1.06    | 0.867   |
| Grass       | Bl   | NF   | 3.368     | 0.589     | 0.639 | 0.169         | -0.039                | 0.017         | 1.423   | 0.859   |
| Herb        | Bl   | SF   | 1.877     | 0.906     | 0.709 | 0.27          | -0.067                | 0.03          | 1.195   | 0.898   |

Com. = compartment: Ab = aboveground, Bl = belowground

Reg. = region: NF = northern Finland, SF = southern Finland

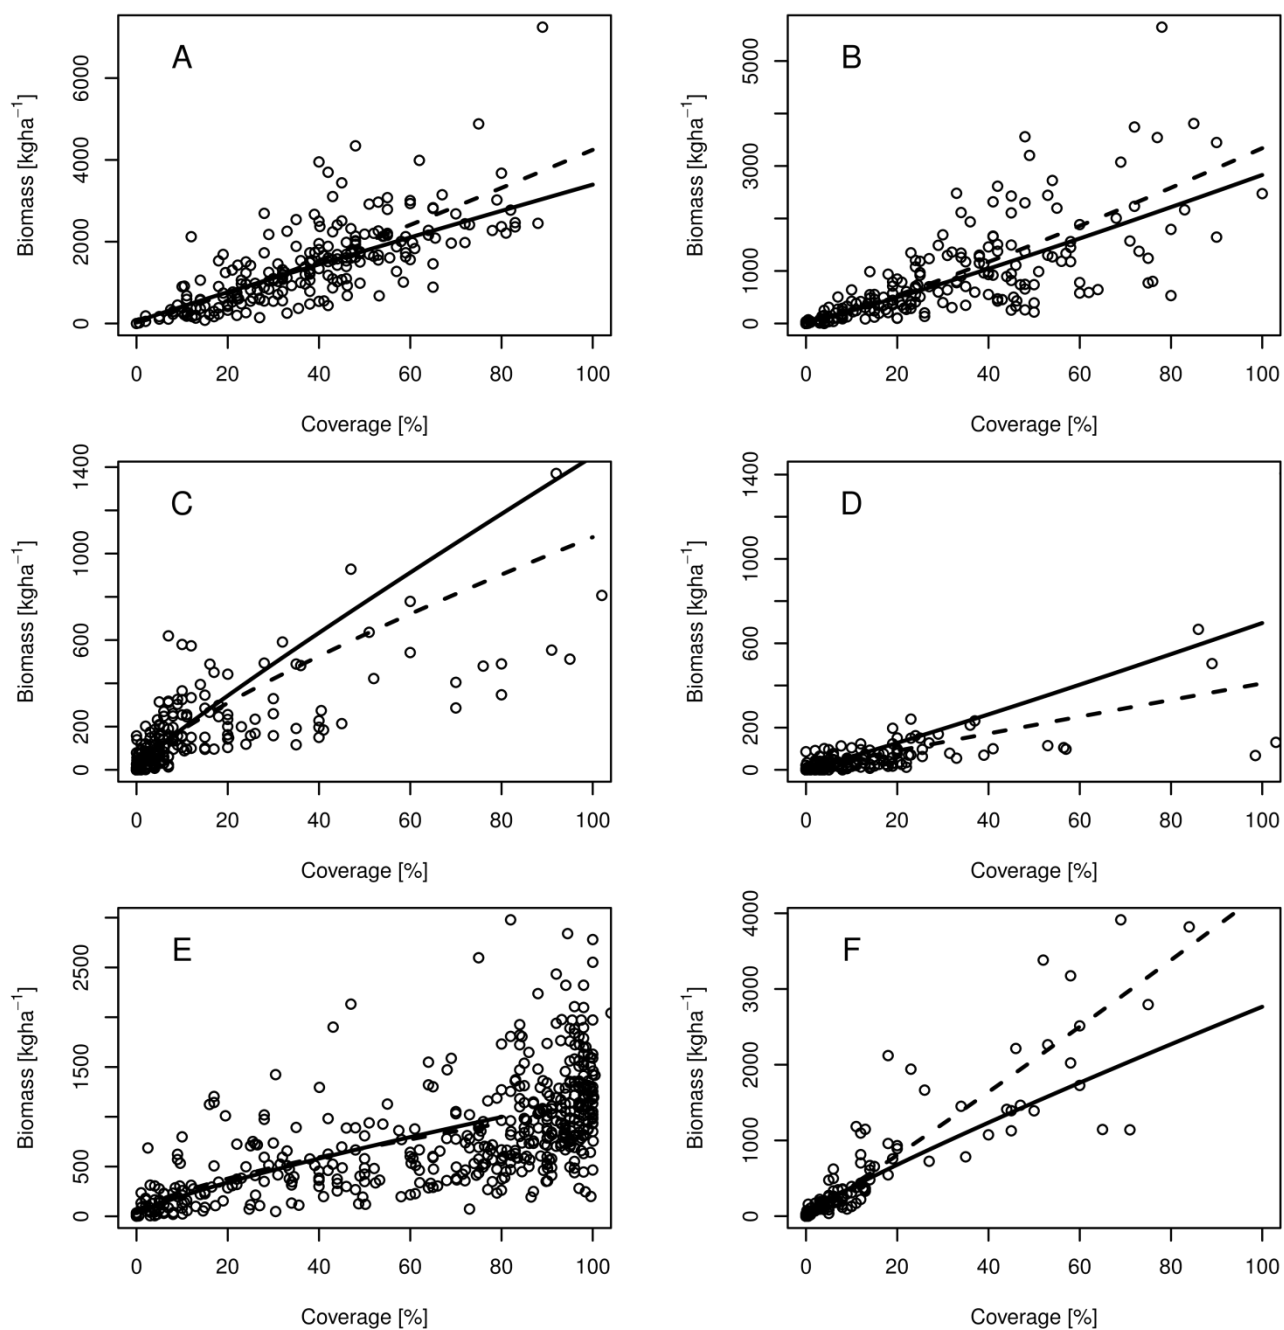

**Figure S1: Models and data points for aboveground understorey biomass (A = Dwarf shrubs in northern Finland, B = Dwarf shrubs in southern Finland, C = Grasses, D = Herbs, E = Mosses and F = Lichen). Solid line based on modelling that takes into account site fertility distribution for Finland by weighting, while dashed line is the estimate without weights.**

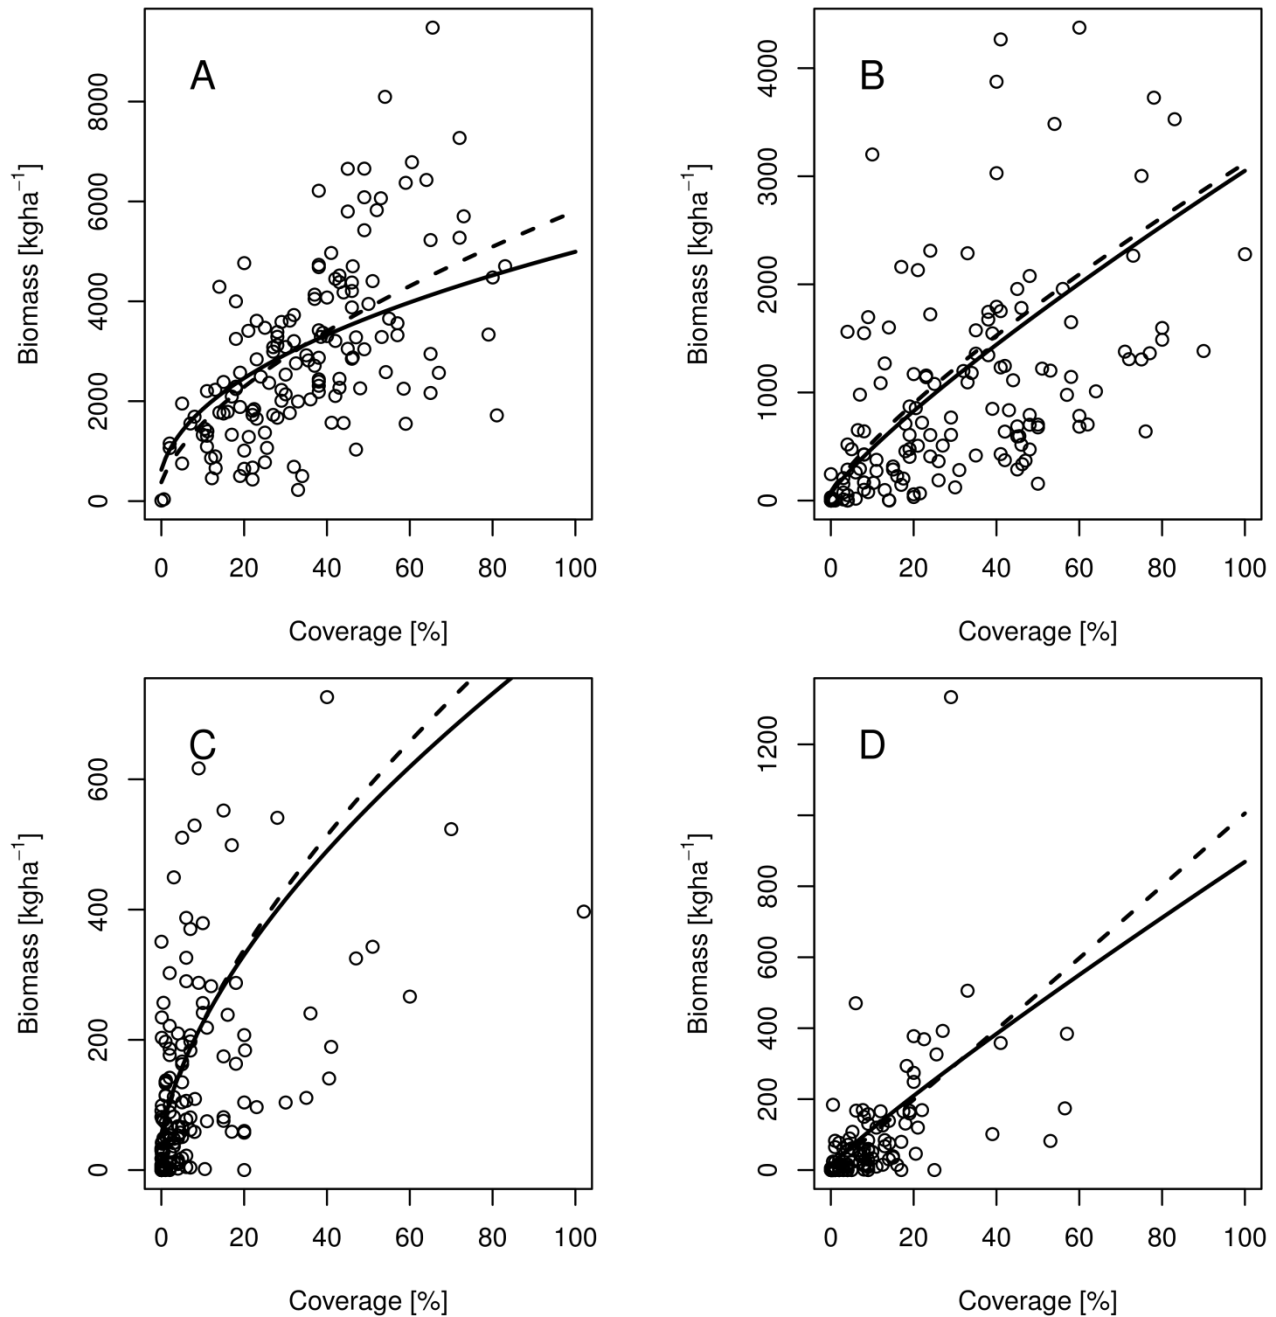

**Figure S2. Models and data points for belowground understorey biomass (A = Dwarf shrubs in northern Finland, B = Dwarf shrubs in southern Finland, C = Grasses and D = Herbs). Solid line based on modelling that takes into account site fertility distribution for Finland by weighting, while dashed line is the estimate without weights.**

R code for variograms and cross-variograms of vegetation group coverages and resulting figure with semivariance as a function of distance (Fig. S3).

```
library(gstat)
```

```
library(sp)
```

```
### peite34 object includes data for vegetation coverages and plot locations across Finland
```

```
coordinates(peite34) = c('x','y')
```

```
#####
```

```
g.r <- gstat(NULL, "dwarf shrubs", r1~x+y,data = peite34, model = v.fitr1, nmax=200)
```

```
g.r <- gstat(g.r, "grass&herb", r2~x+y,data = peite34, model = v.fitr2, nmax=200)
```

```
g.r <- gstat(g.r, "bryophyte", r3~x+y,data = peite34, model = v.fitr3, nmax=200)
```

```
g.r <- gstat(g.r, "lichen", r4~x,data = peite34, model = v.fitr4, nmax=200)
```

```
vm <- variogram(g.r)
```

```
vm.fit <- fit.lmc(vm,g.r,vgm(1200,"Sph",100,300))
```

```
plot(vm, vm.fit)
```

```
## thereafter predictions of the understorey coverage for each location by vegetation groups
```

```
cok.maps <- predict(vm.fit, nfi10loc)
```

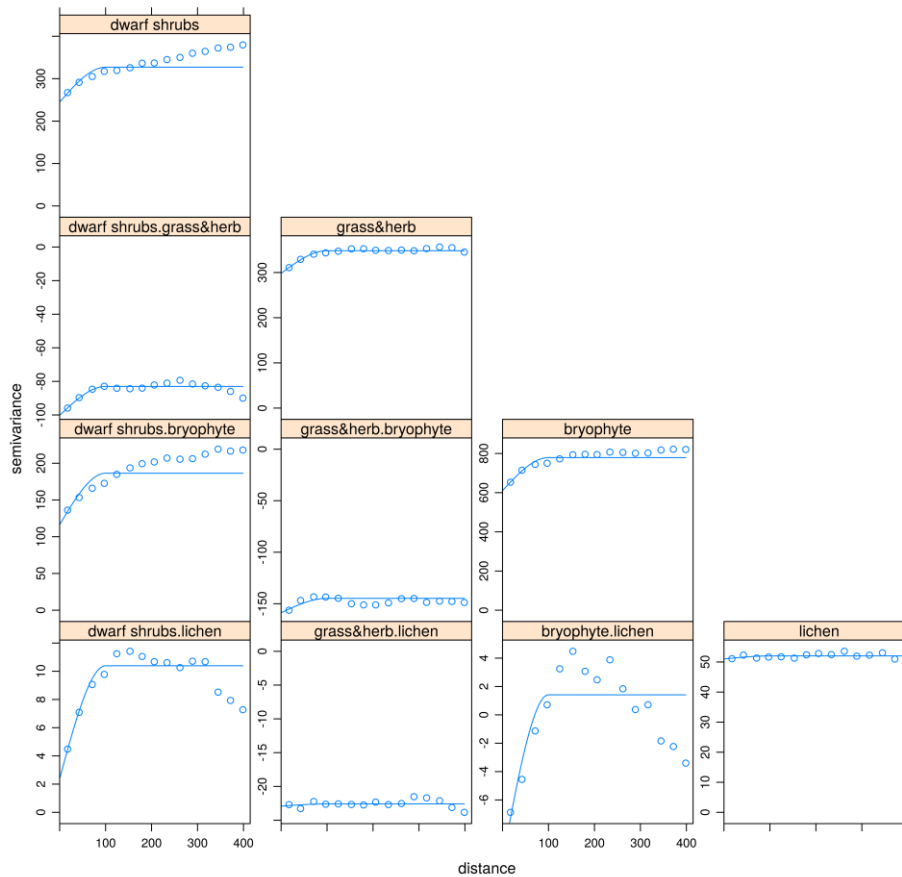

**Figure S3. Variograms and cross-variograms for different functional types of understorey vegetation.**

### 3. Nitrogen content of the litterfall

Table S2. Nitrogen content of litterfall as ratios from mass, based on Komarov et al. (2007).

|                          | Foliage | Branches | Stem wood | Fine roots | Coarse roots | Total |
|--------------------------|---------|----------|-----------|------------|--------------|-------|
| Scots pine               | 0.003   | 0.004    | 0.0014    | 0.0047     | 0.0024       | -     |
| Norway spruce            | 0.0045  | 0.0035   | 0.002     | 0.0035     | 0.003        | -     |
| Deciduous                | 0.007   | 0.004    | 0.0015    | 0.005      | 0.0045       | -     |
| Understorey <sup>1</sup> | -       | -        | -         | -          | -            | 0.006 |

### 4. Soil carbon model Yasso07

Parameters for the Yasso07 have been estimated with Markov Chain Monte Carlo (MCMC) methods where litter bag, wood decomposition and soil carbon stock data were used to calibrate model parameters. Maximum posterior parameters estimates used in this study were based on works by Rantakari et al. (2012) and for earlier version of the global Yasso07 parameterisation that is a close

<sup>1</sup> The nitrogen content of the understorey litterfall was estimated to be 0.6% from dry mass.

variant of the Tuomi et al. (2011) publication (Table S2). Model have been described more in detail in papers where individual components have been reported (Tuomi et al. 2009, Tuomi et al. 2011, Tuomi et al. 2008)

Fortran code of the Yasso07 model is available here:

<http://code.google.com/p/yasso07ui/>

Table S2. Yasso07 maximum *a posterior* (MAP) point estimates Scandinavian (Rantakari et al. 2012) and global parameterization (Tuomi et al. 2011).

| Parameter | Scandinavia | Global | Unit      | Meaning                            |
|-----------|-------------|--------|-----------|------------------------------------|
| aA        | 0.52        | 0.72   | $a^{-1}$  | decomposition rate of A            |
| aW        | 3.55        | 5.9    | $a^{-1}$  | decomposition rate of W            |
| aE        | 0.35        | 0.28   | $a^{-1}$  | decomposition rate of E            |
| aN        | 0.27        | 0.031  | $a^{-1}$  | decomposition rate of N            |
| p1        | 0.04        | 0.48   | .         | mass flow from W to A              |
| p2        | 0.03        | 0.01   | .         | mass flow from E to A              |
| p3        | 0.98        | 0.83   | .         | mass flow from N to A              |
| p4        | 0.64        | 0.99   | .         | mass flow from A to W              |
| p5        | 0.31        | 0.00   | .         | mass flow from E to W              |
| p6        | 0.019       | 0.01   | .         | mass flow from N to W              |
| p7        | 0.023       | 0.00   | .         | mass flow from A to E              |
| p8        | 0.01        | 0.00   | .         | mass flow from W to E              |
| p9        | 0.001       | 0.02   | .         | mass flow from N to E              |
| p10       | 0.34        | 0.00   | .         | mass flow from A to N              |
| p11       | 0.042       | 0.015  | .         | mass flow from W to N              |
| p12       | 0.09        | 0.95   | .         | mass flow from E to N              |
| b1        | 0.09        | 0.95   | $C^{-1}$  | temperature dependence parameter   |
| b2        | -0.0023     | -1.4   | $10^{-1}$ | temperature dependence parameter   |
| y         | -2.94       | -1.21  | $m^{-1}$  | precipitation dependence parameter |
| pH        | 0.15        | 4.5    | $10^{-3}$ | mass flow from A,W,E,N to humus    |
| aH        | -0.24       | -1.6   | $10^{-3}$ | humus decomposition coefficient    |
| roo1      | -0.539      | -1.71  | $cm^{-1}$ | size dependence parameter          |
| roo2      | 1.186       | 0.86   | $cm^{-2}$ | size dependence parameter          |
| r         | -0.264      | -0.306 | .         | size dependence parameter          |

## 5. Soil carbon model ROMULv

ROMUL decomposition model describes the flux of soil organic matter (SOM) through the soil

decomposition process, divided into separate parallel paths of matter based on the different origins of the litter (Chertov and Komarov 1997, Chertov et al. 2001). All fluxes have essentially the same pattern of flux. The litter entering the decomposition process is stored in a store of undecomposed litter (H). This then decomposes into a mixture of partly decomposed (humified) SOM (F). The SOM in the F fraction is decomposed by different types of organisms (fungi, bacteria and earthworms) and end up in storage of semi-stable humus (H). These fluxes (for litter of different origins) are for SOM, but the model also describes a parallel decomposition process for nitrogen in soil, following the same pattern of storages and fluxes.

Litter  $\rightarrow$  L  $\rightarrow$  F  $\rightarrow$  H

In each transition from one storage to another, the rate of decomposition depends on the nitrogen content of the storage (calculated from the ratio of the SOM storage and the corresponding N storage) and the ash content of the litter (fixed percentage for each litter source). These transfer rates are adjusted with coefficient functions depending on soil temperature and soil water content. During each transition, a fraction of the pool is mineralized – SOM released as CO<sub>2</sub> and N released into a pool of mineralized N available to plants, while most of the matter moves to the next pool in the decomposition process. The litter from different sources follow different routes, until they all end up in a common pool of semi-stable humus (H). Finally, also the matter in the H pool slowly decomposes. In each transition from one pool to another, the rate of SOM and N decomposition is the same, except for the transition from F pool to H; here the C:N ratio of the transition is characteristic for all decomposer classes (fungi, bacteria and earthworms), and in this phase the N content of the soil is enriched.

The litter from aboveground (leaves, shoots and trunks) fall onto the forest floor, whereas the root litter (fine roots and coarse roots) decomposes in the mineral soil layer. For the two layers, the decomposition rates based on SOM properties are mostly similar, but the environmental conditions (temperature and soil moisture) may differ for the two layers, resulting in different decomposition rates. The semi-stable storage H is common for all fluxes and resides in the mineral soil layer.

The original ROMUL model uses decomposition rate functions that use gravimetric measures of soil

water as input. As these figures are somewhat tedious to calculate and would require detailed information of the soil characteristics, such as soil density and precise thickness of the soil layers, we used instead a modification presented by Linkosalo et al. (2013) named here as ROMULv. In their paper they produced decomposition rate functions that are based on volumetric soil water measures, and a volumetric soil water model to predict the variation in the soil water content, driven by environmental measures. The volumetric soil water model was easier to apply for multiple simulation points, as it only needs the total potential soil water storage (i.e. difference between field capacity and wilting point) to characterize the soil for the simulations of relative soil water content.

The description of the original ROMUL model is available from here:

<http://ecomodelling.ru/>

For the source code used in this study, see the end of this document.

## ***References***

- Chertov, O. G. and Komarov, A. S.: SOMM: A model of soil organic matter dynamics, *Ecol. Modell.*, 94, 177-189, doi:10.1016/S0304-3800(96)00017-8, 1997.
- Chertov, O. G., Komarov, A. S., Nadporozhskaya, M., Bykhovets, S. S. and Zudin, S. L.: ROMUL — a model of forest soil organic matter dynamics as a substantial tool for forest ecosystem modeling, *Ecol. Model.*, 138, 289-308, doi:10.1016/S0304-3800(00)00409-9, 2001.
- Kleja, D. B., Svensson, M., Majdi, H., Jansson, P., Langvall, O., Bergkvist, B., Johansson, M., Weslien, P., Truusb, L. and Lindroth, A.: Pools and fluxes of carbon in three Norway spruce ecosystems along a climatic gradient in Sweden, *Biogeochemistry*, 89, 7-25, doi:10.1007/s10533-007-9136-9, 2008.
- Komarov, A. S., Chertov, O. G., Nadporozhskaya, M. A., Mikhailov, A. V., Bykhovets, S. S., Zudin, S. L., Priputina, I. V., Larionova, A. A., Grabarnik PY, Z. E., Zudina, E. V. and Shanin, V. N.: Modelirovanie dinamiki organicheskogo veshchestva v lesnykh ekosistemakh [Modelling Organic Matter Dynamics in Forest Ecosystems], Nauka, Russia, 2007.
- Leppälammil-Kujansuu, J., Aro, L., Salemaa, M., Hansson, K., Kleja, D. B. and Helmisaari, H.: Fine root longevity and carbon input into soil from below- and aboveground litter in climatically contrasting forests, *For. Ecol. Manage.*, 326, 79-90, doi:10.1016/j.foreco.2014.03.039, 2014.
- Linkosalo, T., Kolari, P. and Pumpanen, J.: New decomposition rate functions based on volumetric soil water content for the ROMUL soil organic matter dynamics model, *Ecol. Model.*, 263, 109-118, doi:10.1016/j.ecolmodel.2013.04.026, 2013.





```

        subroutine ROMUL(litter,litter_N,T,SW,Navail,
+
            site, year, init)

        implicit none

c litterfall by cohort, soil temperature and water content for organic (==1) and mineral soil layer
(==2)
c init-parameter for initializing the model (1), normal simulation (0) or output the results (2).

        double precision litter(11), litter_N(11)
        real T(2), SW(2)

c mass storages are save-variables, values persist from one call to another
c First dimension of pools is for the SOM cohort, the second for spatial locations
c (except only one pool per geographic location for humus)
        double precision Lpool(11,4000), Fpool(11,4000)
        double precision LNpool(11,4000), FNpool(11,4000)
        double precision Hpool(4000), HNpool(4000)
        save Lpool, Fpool, Hpool, LNpool, FNpool, HNpool

        double precision Navail(4000)
        real time, Nup, fnf, gnf, fnwb, Ndemand, qctot
        integer site, year, init

        integer local_year
        static local_year

c declare decomposition coefficient functions
        real f_1, f_2, f_3, f_4, f_5, f_6
        real g_1, g_2, g_3, g_4, g_5, g_6

c
c * N pools etc
c
c litter in 11 separate pools
c all have L and F fractions, one H fraction
c all fractions have SOM and N
c cohorts are order thus:
c   1  foliage
c   2  branches
c   3  stems
c   4  fine roots
c   5  coarse roots
c  11  ground vegetation
c Note! Cohorts 6 to 10 are for felling residues, but in this version
c they are calculated in corresponding litter cohorts (6->1 etc.)

c parameters - following ROMUL
c
c      kL          specific rate of leaching (yr-1)      1.0

```

```

c      kDL(i)  specific rate of litter decomposition (yr-1)      0.3
c      kDF(i)  specific rate of SOM decomposition (yr-1)      0.3
c      kTL(i)  specific rate of transfer from litter to SOM (yr-1)
c      kTF(i)  specific rate of transfer from SOM to humus, comp. 1 (yr-1)      0.3
c      kTF2(i) specific rate of transfer from SOM to humus, comp. 2 (yr-1)      0.3
c      kDH      specific rate of humus decomposition (yr-1) 1/6000
c      kUG      maximum specific N uptake rate of ground vegetation (yr-1) 100
c      DeposN  N deposition (free input) (kg yr-1) 1
c
c      ash_cont(i) ash content of cohorts
c      fnf      foliar N concentration in live foliage
c      gnf      retention of foliar N when shedding foliage 0.45
c
c

```

```

cccccccccccccccccccccccccccccccccccccccccccccccccccccccccccccccc

```

```

c Declare internal variables

```

```

double precision DeposN, LeachN
double precision d_Lpool(11),d_Fpool(11),d_HumusPool
double precision d_LNpool(11),d_FNpool(11),d_HumusNPool
double precision d_Navail
double precision fn(11)
real kL, kM, DM
double precision kDL(11), kDH
double precision kDF(11)
double precision kTL(11)
double precision kTF(11),kTF2(11)
real LKP_decomp
double precision K_1S_rma, K_2S_rma,K_3S_rma, k_1L_rma,K_2L_rma
double precision k_3L_rma, k_4_rma,k_5_rma,k_6_rma
double precision ML, MF(11), MFres(11), MH, gamma, GVN1, GVN2
double precision N_release, FH_FluxB, FH_fluxL, FHN_FluxB, FHN_fluxL
double precision MF_flux, MF_min
double precision H_miner, H_C, C_C, DeltaB, DeltaL, dL
double precision x1, x2, ash_cont(11)
integer inttime, i, j, k, inttimetot
double precision Lpoolsum(5),Fpoolsum(5),LNpoolsum(5),FNpoolsum(5)
double precision littersum(5), Fpooltot(2), FNpooltot(2), H_CN
double precision Lpooltot(2), LNpooltot(2)
double precision NFconc(2), NLconc(2)
double precision step

```

```

c assign parameter values

```

```

data kL
1 /0.12/

data (ash_cont(i) , i=1,11)
1 /0.02, 0.02, 0.01, 0.02, 0.02, 0.02, 0.02, 0.01,

```

```
1 0.02, 0.01, 0.04/
```

```
data fnf, gnf /0.02, 0.45/
```

```
data DeposN, kM, DM /2., 2., 0.3/
```

```
data ML, gamma, C_C / 0.1, 0.8, 0.5/
```

```
data deltaB, deltaL /24., 12.8/
```

```
dL = 1
```

```
c read inputs when coming to this subroutine for the first time (init = 1)
```

```
if (init.eq.1) then
```

```
    open(unit=25,file='soil.dat',status = 'old', err = 999)
```

```
    do 100 i = 1, site
```

```
        read(25,*) j, (Lpool(j,i),j=1,5),Lpool(11,i),
```

```
+            (Fpool(j,i),j=1,5),Fpool(11,i),
```

```
+            Hpool(i),
```

```
+            (LNpool(j,i),j=1,5),LNpool(11,i),
```

```
+            (FNpool(j,i),j=1,5),FNpool(11,i),
```

```
+            HNpool(i)
```

```
100    continue
```

```
        close(25)
```

```
        goto 998
```

```
999    write(*,*) "failed to open soil.dat"
```

```
        local_year = 0
```

```
998    return
```

```
endif
```

```
c write storages to file when coming to this subroutine for the last time (init = 2)
```

```
if (init.eq.2) then
```

```
    open(unit=25,file='soil.dat',status = 'old')
```

```
    write(*,*) "writing soil.dat..."
```

```
    do 101 i = 1, site
```

```
        write(25,997) i, (Lpool(j,i),j=1,5),Lpool(11,i),
```

```
+            (Fpool(j,i),j=1,5),Fpool(11,i),
```

```
+            Hpool(i),
```

```
+            (LNpool(j,i),j=1,5),LNpool(11,i),
```

```
+            (FNpool(j,i),j=1,5),FNpool(11,i),
```

```
+            HNpool(i)
```

```
997    format(i5,12f12.2,f14.2,12f12.5,f14.3)
```

```

101      continue
        close(25)
        return
      endif

c Daily calculation starts here!

      do 65 i = 1, 11
        fn(i) = litter_N(i)/litter(i)
65      continue

c "step" is for substeN of differential calculation, with daily weather data
c no substeN needed.
      step = 1

c compute specific rate parameters as functions of ash content and N content
c compute total N in litter

c first the N concentration for the F-pools:
c index 1 = organic layer, and 2 = mineral soil

      Lpooltot(1) = Lpool(1,site) + Lpool(2,site) + Lpool(3,site) +
+               Lpool(11,site)
      LNpooltot(1) = LNpool(1,site) + LNpool(2,site) + LNpool(3,site) +
+               LNpool(11,site)
      Fpooltot(1) = Fpool(1,site) + Fpool(2,site) + Fpool(3,site) +
+               Fpool(11,site)
      FNpooltot(1) = FNpool(1,site) + FNpool(2,site) + FNpool(3,site) +
+               FNpool(11,site)
      Fpooltot(2) = Fpool(4,site) + Fpool(5,site)
      FNpooltot(2) = FNpool(4,site) + FNpool(5,site)

      NFconc(1) = FNpooltot(1) / Fpooltot(1)
      NFconc(2) = FNpooltot(2) / Fpooltot(2)
      NLconc(1) = LNpooltot(1) / Lpooltot(1)
      NLconc(2) = LNpooltot(2) / Lpooltot(2)

      do 25 i = 1,5

        if(i.ge.4) then
          kDL(i) = k_1S_rma(ash_cont(i), fn(i)) *
*             f_1(T(2)) * LKP_decomp(SW(2), 0.55)
          kDF(i) = k_2S_rma(ash_cont(i), NFconc(2)) *
*             f_2(T(2)) * LKP_decomp(SW(2), 0.55)
          kTL(i) = k_3S_rma(ash_cont(i), fn(i)) *
*             f_3(T(2)) * LKP_decomp(SW(2), 0.55)
        else

```

```

        kDL(i) = k_1L_rma(ash_cont(i), fn(i)) *
*         f_1(T(1)) * LKP_decomp(SW(1), 0.7)
        kDF(i) = k_2L_rma(ash_cont(i), NFconc(1)) *
*         f_2(T(1)) * LKP_decomp(SW(1), 0.7)
        kTL(i) = k_3L_rma(ash_cont(i), fn(i)) *
*         f_3(T(1)) * LKP_decomp(SW(1), 0.7)
    endif

    kTF(i) = k_4_rma(ash_cont(i), NFconc(2)) *
*         f_4(T(2)) * LKP_decomp(SW(2), 0.55)
    kTF2(i) = k_5_rma(ash_cont(i), NFconc(2)) *
*         f_5(T(2)) * LKP_decomp(SW(2), 0.55)

25    continue

    kDL(11) = k_1L_rma(ash_cont(11), fn(11)) *
*         f_1(T(1)) * LKP_decomp(SW(1), 0.7)
    kDF(11) = k_2L_rma(ash_cont(11), NFconc(1)) *
*         f_2(T(1)) * LKP_decomp(SW(1), 0.7)
    kTL(11) = k_3L_rma(ash_cont(11), fn(11)) *
*         f_3(T(1)) * LKP_decomp(SW(1), 0.7)

    kTF(11) = k_4_rma(ash_cont(11), NFconc(2)) *
*         f_4(T(1)) * LKP_decomp(SW(1), 0.55)
    kTF2(11) = k_5_rma(ash_cont(11), NFconc(1)) *
*         f_5(T(1)) * LKP_decomp(SW(1), 0.55)

    kDH = k_6_rma() * f_6(T(2)) * LKP_decomp(SW(2), 0.55)

c    update N pools

    Nup = 0.

c    do 100 inttime = 1, inttimetot

    LeachN = kL * Navail(site)
    LeachN = max(LeachN, 0.)

c C pools: derivatives

    FH_fluxB = 0.
    FH_fluxL = 0.
    FHN_fluxB = 0.

```

```

FHN_fluxL = 0.

do 10 i = 1,5

    d_Lpool(i) = litter(i) + litter(i+5) -
-      (kDL(i) + kTL(i)) * Lpool(i,site)

    d_Fpool(i) = kTL(i) * Lpool(i,site)
1      -(kDF(i) + kTF(i) + kTF2(i)) * Fpool(i,site)

    FHN_fluxB = FHN_fluxB + kTF(i) * FNpool(i,site)
    FHN_fluxL = FHN_fluxL + kTF2(i) * FNpool(i,site)
    FH_fluxB = FH_fluxB + kTF(i) * Fpool(i,site)
    FH_fluxL = FH_fluxL + kTF2(i) * Fpool(i,site)

10  continue

    d_Lpool(11) = litter(11) -
-      (kDL(11) + kTL(11)) * Lpool(11,site)

    d_Fpool(11) = kTL(11) * Lpool(11,site)
1      -(kDF(11) + kTF(11) + kTF2(11)) * Fpool(11,site)

    FHN_fluxB = FHN_fluxB + kTF(11) * FNpool(11,site)
    FHN_fluxL = FHN_fluxL + kTF2(11) * FNpool(11,site)
    FH_fluxB = FH_fluxB + kTF(11) * Fpool(11,site)
    FH_fluxL = FH_fluxL + kTF2(11) * Fpool(11,site)

    d_HumusPool = DeltaB * FHN_fluxB + DeltaL * FHN_fluxL
+      - kDH * Hpool(site)

c calculate MF(i)

do 11 i = 1,5

    if((100.*NFconc(2) - 1.16 * 100.*NFconc(1)) . le. 0.44) then
        MF(i) = 0.1
    else
        if((100.*NFconc(2) - 1.16*100.*NFconc(1)) . le. 1.50) then
            MF(i) = 0.5
        else
            MF(i) = 1.0
        endif
    endif
endif

```

11     continue

```

      if((100.*NFconc(2) - 1.16 * 100.*NFconc(1)) . le. 0.44) then
        MF(11) = 0.1
      else
        if((100.*NFconc(2) - 1.16*100.*NFconc(1)) . le. 1.50) then
          MF(11) = 0.5
        else
          MF(11) = 1.0
        endif
      endif
endif
```

c MF\_flux is transferred from F to H, MF\_min is released

MF\_flux = 0.

MF\_min = 0.

do 20 i = 1,5

```

      d_LNpool(i) = litter_N(i) + litter_N(i+5)
1      - (ML*kDL(i) + kTL(i)) * LNpool(i,site)
```

```

      d_FNpool(i) = (kTL(i)) * LNpool(i,site)
1      - MF(i) * kDF(i) * FNpool(i,site)
1      - (kTF(i) + kTF2(i)) * FNpool(i,site)
```

MF\_flux = MF\_flux + (1-MF(i)) \* kDF(i) \* FNpool(i,site)

MF\_min = MF\_min + MF(i) \* kDF(i) \* FNpool(i,site)

Lflux(i,site) = Lflux(i,site) + ML\*kDL(i) \* LNpool(i,site)

Fflux(i,site) = Fflux(i,site) + MF(i)\*kDF(i) \* FNpool(i,site)

20     continue

```

      d_LNpool(11) = fn(11) * litter(11)
1      - (ML*kDL(11) + kTL(11)) * LNpool(11,site)
```

```

      d_FNpool(11) = (kTL(11)) * LNpool(11,site)
1      - MF(11) * kDF(11) * FNpool(11,site)
1      - (kTF(11) + kTF2(11)) * FNpool(11,site)
```



```

MF_flux = MF_flux + (1-MF(11)) * kDF(11) * FNpool(11,site)
MF_min = MF_min + MF(11) * kDF(11) * FNpool(11,site)

```

```

if(HNpool(site) .gt. 0.) then
    H_CN = Hpool(site) / HNPool(site) / 2.
else
    H_CN = 100.
endif

```

```

if(H_CN .gt. 8.) then
    MH = 0.8
else
    MH = 1.
endif

```

```

d_HumusNPool =
+           - kDH * MH * HNpool(site)
1           + gamma * (FHN_fluxB + FHN_fluxL)

```

C Calculate mineralised carbon

```

H_miner = kDH * Hpool(site) + FH_fluxB + FH_fluxL
1           - DeltaB * FHN_fluxB - DeltaL * FHN_fluxL
1           - DeltaB * kM * Navail(site)

```

```

do 15 i = 1,5
    H_miner = H_miner + kDL(i) * Lpool(i,site)
+           + kDF(i) * Fpool(i,site)
15 continue

    H_miner = H_miner + kDL(11) * Lpool(11,site)
+           + kDF(11) * Fpool(11,site)

```

```

H_C = C_C * H_miner
C_sum(site) = C_sum(site) + H_C

```

c calculate N release

```

N_release =      kDH * MH * HNpool(site)
1           + (1. - gamma) * (FHN_fluxB + FHN_fluxL)
1           + DeposN
c    1           - kM * Navail(site) + DeposN

```

```

Hflux(site) = Hflux(site) + kDH* MH * HNpool(site)

do 16 i = 1,5
    N_release = N_release + ML * kDL(i) * LNpool(i,site)
1    + MF(i) * kDF(i) * FNpool(i,site)

16    continue

    N_release = N_release + ML * kDL(11) * LNpool(11,site)
1    + MF(11) * kDF(11) * FNpool(11,site)

    d_Navail = N_release - LeachN
c    1    - N_coeff_TR * Ndemand
c    1    - N_coeff_GV1 * Gr_GVegN1 - N_coeff_GV2 * Gr_GVegN2

c Update pools - use simple Euler

do 17 i = 1, 5
c daily version -> step equals one!
    Lpool(i,site) = Lpool(i,site) + d_Lpool(i) * step
    Fpool(i,site) = Fpool(i,site) + d_Fpool(i) * step
    LNpool(i,site) = LNpool(i,site) + d_LNpool(i) * step
    FNpool(i,site) = FNpool(i,site) + d_FNpool(i) * step
17    continue

    Lpool(11,site) = Lpool(11,site) + d_Lpool(11) * step
    Fpool(11,site) = Fpool(11,site) + d_Fpool(11) * step
    LNpool(11,site) = LNpool(11,site) + d_LNpool(11) * step
    FNpool(11,site) = FNpool(11,site) + d_FNpool(11) * step

HPool(site) = HPool(site) + d_HumusPool * step
HNPool(site) = HNPool(site) + d_HumusNPool * step
Navail(site) = Navail(site) + d_Navail * step

N_sum(site) = N_sum(site) + d_Navail * step

c    Navail(site) = max(Navail(site), 0.)

return
end subroutine ROMUL

```

```

c -----
c The functions for rate of decomposition modifiers depending on temperature
c of the corresponding cohort. These new functions are from Komarov et al. 2008.
c
c Tapio Linkosalo October 2008
c -----
real function f_1(T)

    real T

    if (T .LE. -5.0 .OR. T .GT. 60.0) then
        f_1 = 0
    endif
    if (T .GT. -5.0 .AND. T .LE. 1.0) then
        f_1 = 0.1595 + 0.0319 * T
    endif
    if (T .GT. 1.0 .AND. T .LE. 35.0) then
        f_1 = 0.1754 * exp(0.0871 * T)
    endif
    if (T .GT. 35.0 .AND. T .LE. 60.0) then
        f_1 = 8.791 - 0.1465 * T
    endif

    return

end

c -----
real function f_2(T)

    real T

    if (T .LE. -5.0 .OR. T .GT. 60.0) then
        f_2 = 0
    endif
    if (T .GT. -5.0 .AND. T .LE. 1.0) then
        f_2 = 0.1595 + 0.0319 * T
    endif
    if (T .GT. 1.0 .AND. T .LE. 35.0) then
        f_2 = 0.1754 * exp(0.0871 * T)
    endif
    if (T .GT. 35.0 .AND. T .LE. 60.0) then
        f_2 = 3.690 - 0.0615 * T
    endif

    return

end

c -----
real function f_3(T)

```

```

real T

if (T .LE. -3.0) then
    f_3 = 0
endif
if (T .GT. -3.0 .AND. T .LE. 7.0) then
    f_3 = 1.3
endif
if (T .GT. 7.0 .AND. T .LE. 60.0) then
    f_3 = 1.472 - T * 0.0245
endif
if (T .GT. 60.0) then
    f_3 = 0
endif

return

end

```

c

```

-----
real function f_4(T)

real T

if (T .LE. -5.0) then
    f_4 = 0
endif
if (T .GT. -5.0 .AND. T .LE. 1.0) then
    f_4 = 0.1595 + 0.0319 * T
endif
if (T .GT. 1.0 .AND. T .LE. 20.0) then
    f_4 = 0.1754 * exp(0.0871 * T)
endif
if (T .GT. 20.0 .AND. T .LE. 40.0) then
    f_4 = 1
endif
if (T .GT. 40.0 .AND. T .LE. 80.0) then
    f_4 = 2.0 - 0.025 * T
endif
if (T .GT. 80.0) then
    f_4 = 0
endif

return

end

```

c

```

-----
real function f_5(T)

real T

if (T .LE. -5.0) then

```

```

        f_5 = 0
    endif
    if (T .GT. -5.0 .AND. T .LE. 1.0) then
        f_5 = 0.078 + 0.0156 * T
    endif
    if (T .GT. 1.0 .AND. T .LE. 13.0) then
        f_5 = 0.0675 * exp(0.2088 * T)
    endif
    if (T .GT. 13.0 .AND. T .LE. 25.0) then
        f_5 = 1
    endif
    if (T .GT. 25.0 .AND. T .LE. 50.0) then
        f_5 = 2.0 - 0.04 * T
    endif
    if (T .GT. 50.0) then
        f_5 = 0
    endif

    return
end
c -----
real function f_6(T)

    real T

    if (T .LE. -5.0) then
        f_6 = 0
    endif
    if (T .GT. -5.0 .AND. T .LE. 1.0) then
        f_6 = 0.1595 + 0.0319 * T
    endif
    if (T .GT. 1.0 .AND. T .LE. 27.5) then
        f_6 = 0.1754 * exp(0.0871 * T)
    endif
    if (T .GT. 27.5 .AND. T .LE. 35.0) then
        f_6 = 1.95
    endif
    if (T .GT. 35.0 .AND. T .LE. 60.0) then
        f_6 = 4.68 - 0.078 * T
    endif
    if (T .GT. 60.0) then
        f_6 = 0
    endif

    return
end
c -----
c
c Decomposition rate function for volumetric soil water content (theta) (where
c theta = 0 == wilting point and theta = 1 == saturation), based on paper

```

```

c   Linkosalo, Kolari & Pumpanen 2013.
c
c   -----
real function LKP_decomp(theta, porosity)

    real  theta, porosity, P1, P2

    P1 = 3.83 * theta ** 1.25
    P2 = 4.43 * (1-theta)**0.8854
    LKP_decomp = min(P1,P2,1.)

    return
end

c
c   -----
c   The following are the k coefficients for the decomposition rate, depending on
c   litter ash and N content. The two values are given as parameters (absolute
c   values g/g, NOT percentage as in Romul equations!) so that the same functions
c   can be used whether the parameter values are for a specific cohort or litter
c   in general. These are the "new" functions as in Komarov et al. 2008.
c
c   TL October 2008.
c   -----
double precision function k_1L_rma(ash, N)

    double precision ash, N

    k_1L_rma = 0.0005 + 0.54 * N

    return
end
c
c   -----
double precision function k_1S_rma(ash, N)

    double precision ash, N

    k_1S_rma = 0.0136 + 0.06 * ash

    return
end
c
c   -----
double precision function k_2L_rma(ash, N)

    double precision ash, N

    k_2L_rma = 0.00060

    return
end

```

```

c -----
double precision function k_2S_rma(ash, N)

    double precision ash, N

    k_2S_rma = 0.00126

    return
end
c -----
double precision function k_3L_rma(ash, N)

    double precision ash, N

    k_3L_rma = 0.0089 + 0.78 * N

    return
end
c -----
double precision function k_3S_rma(ash, N)

    double precision ash, N

    if (ash .LT. 0.18) then
k_3s_rma = 0.0394 - 0.21 * ash
    else
k_3S_rma = 0.0394 - 0.21 * 0.18
    endif

    return
end
c -----
double precision function k_4_rma(ash, N)

    double precision ash, N

    if (N .LE. 0.02) then
        k_4_rma = 0.05 * N
    else
        k_4_rma = 0.001
    endif

    return
end
c -----
double precision function k_5_rma(ash, N)

    double precision ash, N

```

```

        if (N .LE. 0.005) then
            k_5_rma = 0
        else
            if (N .GE. 0.02) then
                k_5_rma = 0.007
            else
                k_5_rma = 0.007 * (100*(2*N - 0.01)/3)
            endif
        endif
    endif
    return
end
c -----
double precision function k_6_rma()

    k_6_rma = 0.00006

    return
end
c -----

c *****
c
c Subroutine simulates the soil water content in two layers,
c organic layer on top and mineral soil layer in bottom.
c
c Model presented in Linkosalo, Kolari and Pumpanen 2013.
c
c Input/output parameters: SW (SoilWater, absolute, in mm)
c                          theta (output for calc, 0 = WP and 1 = sat)
c                          prec (precipitation, in mm)
c                          ET_tot (total evapotranspiration in mm)
c
c Local parameters per layer: saturation (mm), FC (mm), WP (mm), tau (days)
c                          ET_ratio (split of ET between layers)
c *****

Subroutine two_layer_soil_water(SoilW, SWmax, theta, prec, ET_tot)

c local variables
    integer i
    real theta(2), SoilW(2), ET_tot, prec
    real FC(2), WP(2), saturation(2), ET(2)
    real tau_soil(2), ET_ratio, overflow
    real P1, P2, P_H, P_M
    real SWmax(2)

c Soil water submodel parameters

```



```

ET_ratio = 0.256107371
tau_soil(1) = 0.894587365
tau_soil(2) = 9.418136372
saturation(1) = SWmax(1)/0.65
saturation(2) = SWmax(2)/0.65
wp(1) = 0
wp(2) = 0
FC(1) = WP(1) + SWmax(1)
FC(2) = WP(2) + SWmax(2)

c Split evapotranspiration for the two layers
ET(1) = ET_ratio * ET_tot
if(ET(1) .gt. SoilW(1)) then
    ET(1) = SoilW(1)
endif
ET(2) = ET_tot - ET(1)

c Soilwater of organic layer from previous day over field capacity? -> overflow
if (SoilW(1) .gt. FC(1)) then
    overflow = (SoilW(1) - FC(1)) / tau_soil(1)
    SoilW(1) = FC(1)
else
    overflow = 0
endif

SoilW(1) = SoilW(1) + prec - ET(1)

c New soil water of organic layer over saturation -> immediately drainage
if (SoilW(1) .gt. saturation(1)) then
    overflow = overflow + (SoilW(1) - saturation(1))
    SoilW(1) = saturation(1)
endif

c      SoilW(2) = max(SoilW(2), SoilWP(2))

c Mineral soil over FC -> overflow
if (soilW(2) .gt. FC(2)) then
    soilW(2) = soilW(2) - (soilW(2) - FC(2)) / tau_soil(2)
endif

c Now add new water and subtract ET
SoilW(2) = SoilW(2) + overflow - ET(2)

if (soilW(2) .gt. saturation(2)) then
    soilW(2) = saturation(2)
c      overflow = saturation(2) - SoilW(2)
endif

if (SoilW(2) .lt. WP(2)) then

```

```

        ET(2) = ET(2) - (WP(2) - SoilW(2))
        soilW(2) = WP(2)
    endif

    ET_tot = ET(1) + ET(2)

    theta(1) = (soilW(1) - WP(1)) / (Saturation(1) - WP(1))
    theta(2) = (soilW(2) - WP(2)) / (Saturation(2) - WP(2))

    return
end

```

```

c-----
c
c      Evapotranspiration function based loosely on paper
c      Duursma et al. Tree Physiology 2008, but the dependency of ET on irradiation
c      modified by T. Linkosalo and fitted to Hyytiälä data in spring 2009
c
c-----
      real function EvapoTranspiration (Temp, PAR, VPD, x, CO2effect,
+          CO2ppm, REW, fDET)

c
      real ET
      real Temp, PAR, VPD, x, REW, fDET
      real beta, tau, x0, kappa, a_1, a_2, CO2ppm
      integer CO2effect

c      parameters hard-coded...

      beta = 0.016752
      tau = 14.39305
      x0 = -6.94684
      kappa = -0.000263
      a_1 = 0.0007
      a_2 = 0.0837

c      calculate S and D functions
          x = x + (Temp - x)/tau
          fS = max(0.0, x - x0)
          fD = exp(kappa * VPD)

c      calculate ET
          ET = beta * PAR * fS * fD + a_1*PAR + a_2

c Convert ET from mol/m2/d to g/m2/d
      ET = ET * 18

```

```
c Convert ET from g/m2/d to mm/d (ET/rho and m -> mm)
```

```
ET = ET / 1000
```

```
fDET = 1
```

```
if (REW .LT. 0.4) then
```

```
    fDET = REW/0.4
```

```
    ET = ET * fDET
```

```
endif
```

```
EvapoTranspiration = ET
```

```
return
```

```
end
```

```
c-----
```

```
subroutine SoilTemperature(ST, T)
```

```
implicit none
```

```
real ST(2), T, adj_T(2)
```

```
c parameters for soil temperature model
```

```
real minimum_temp(2), tau(2)
```

```
minimum_temp(1) = -0.13
```

```
minimum_temp(2) = 0.24
```

```
tau(1) = 14.9
```

```
tau(2) = 10.5
```

```
adj_T(1) = max(T, minimum_temp(1))
```

```
adj_T(2) = max(T, minimum_temp(2))
```

```
ST(1) = ST(1) + (adj_T(1) - ST(1)) / tau(1)
```

```
ST(2) = ST(2) + (adj_T(2) - ST(2)) / tau(2)
```

```
return
```

```
end
```
